# Supplementary material for: Disease-, region- and cell type specific diversity of α-synuclein carboxy terminal truncations in synucleinopathies
Source: PubMed Central journal article supplement (PMC8403399; doi:10.1186/s40478-021-01242-2), 2021-08-28
Supplement: 40478_2021_1242_MOESM1_ESM.pdf [file 40478_2021_1242_MOESM1_ESM.pdf]

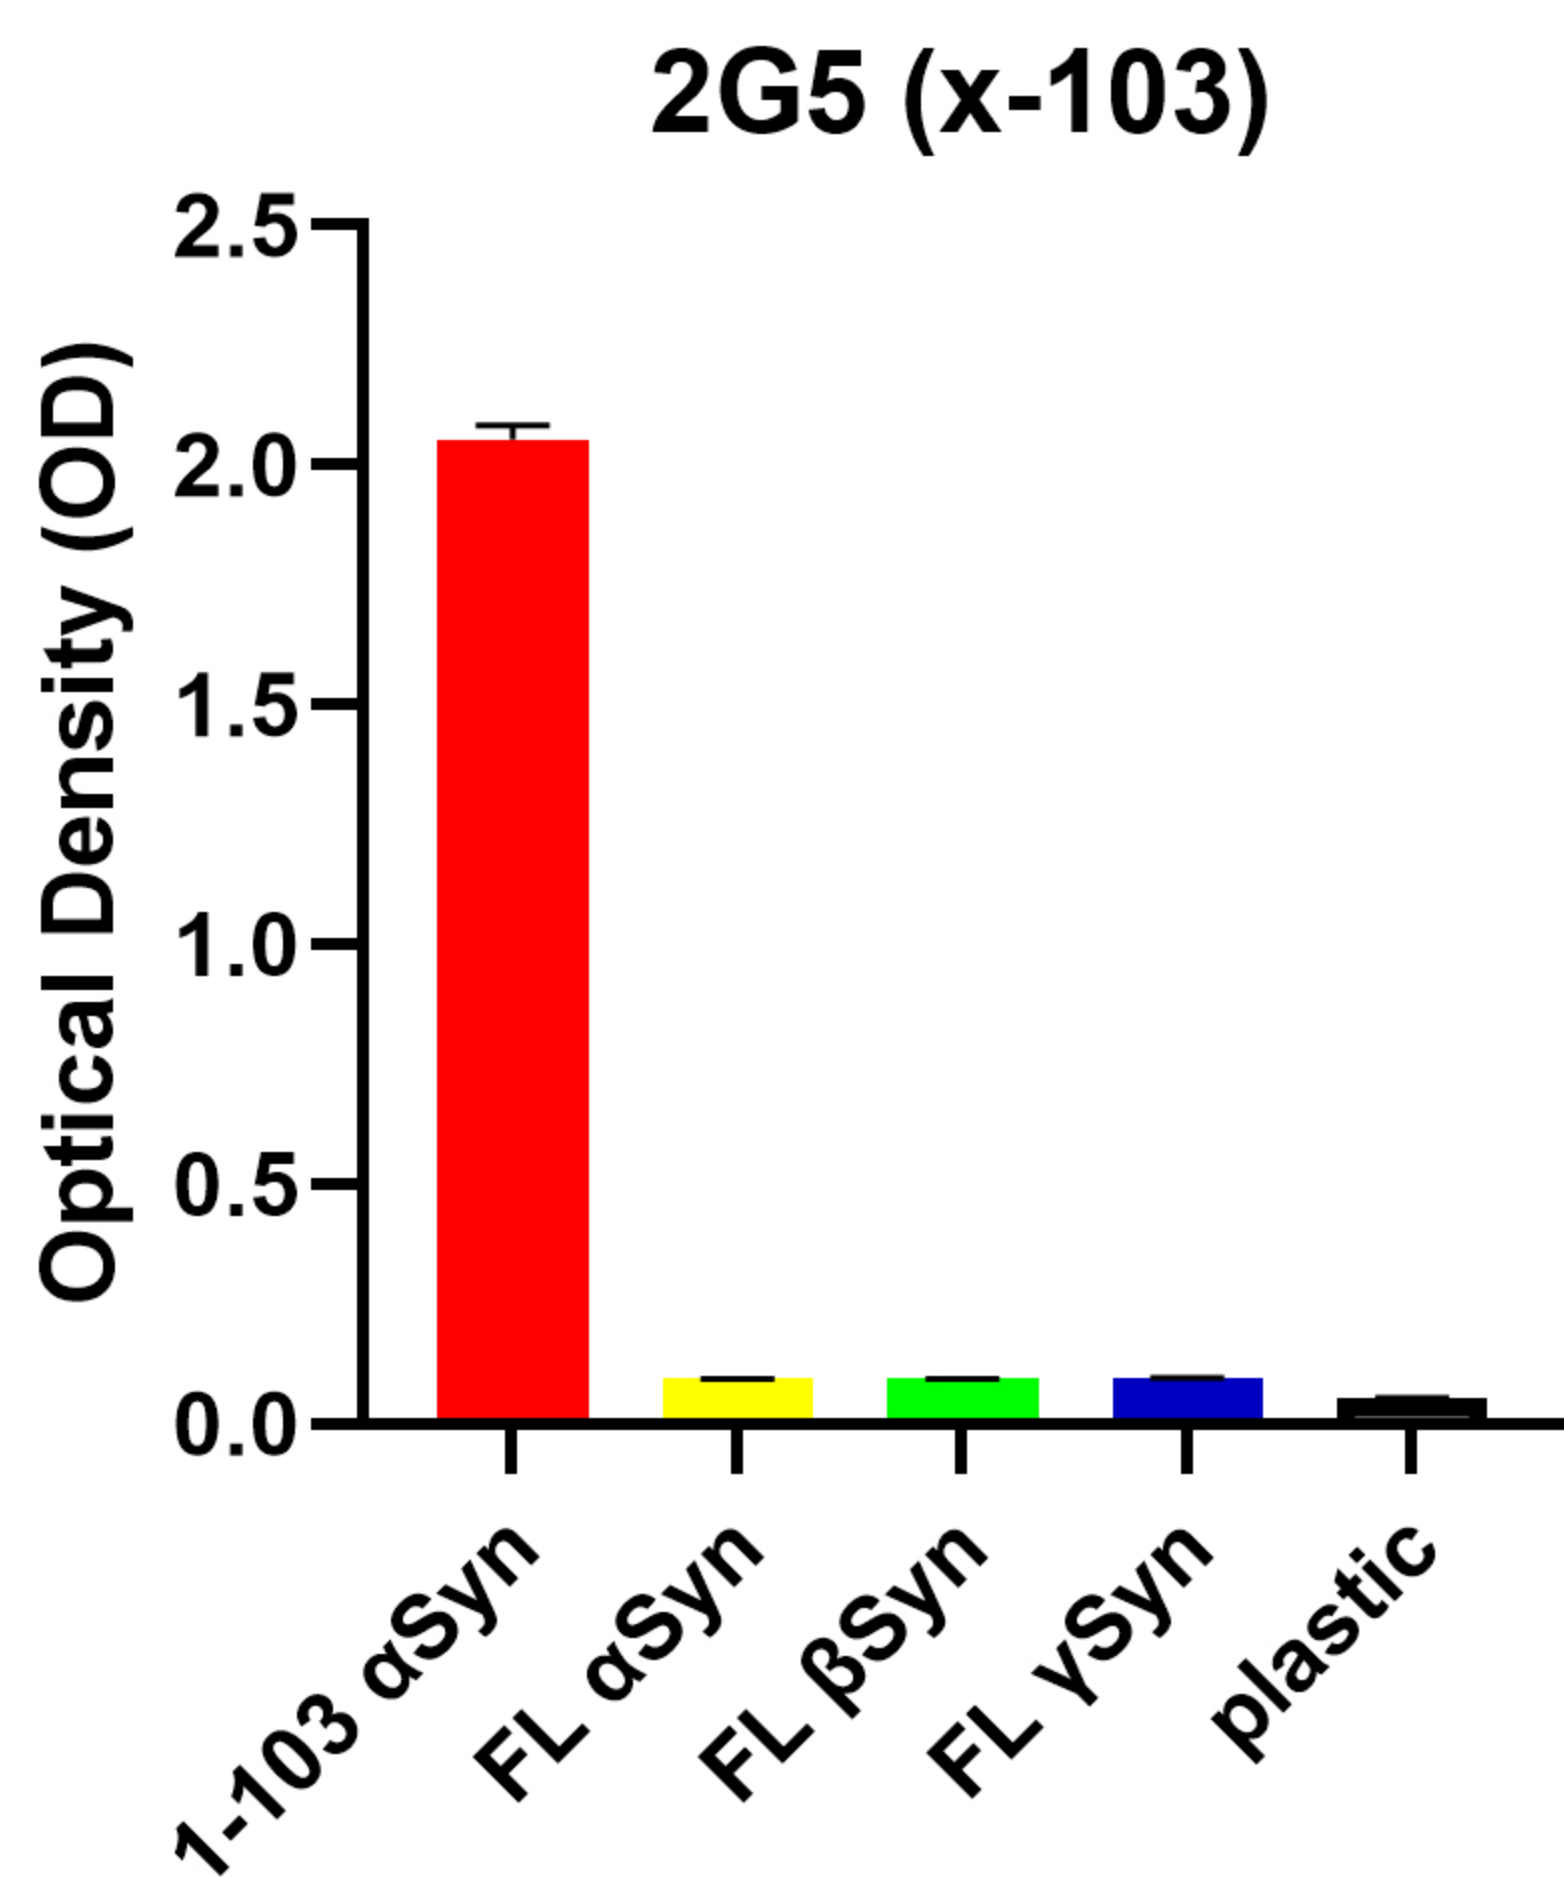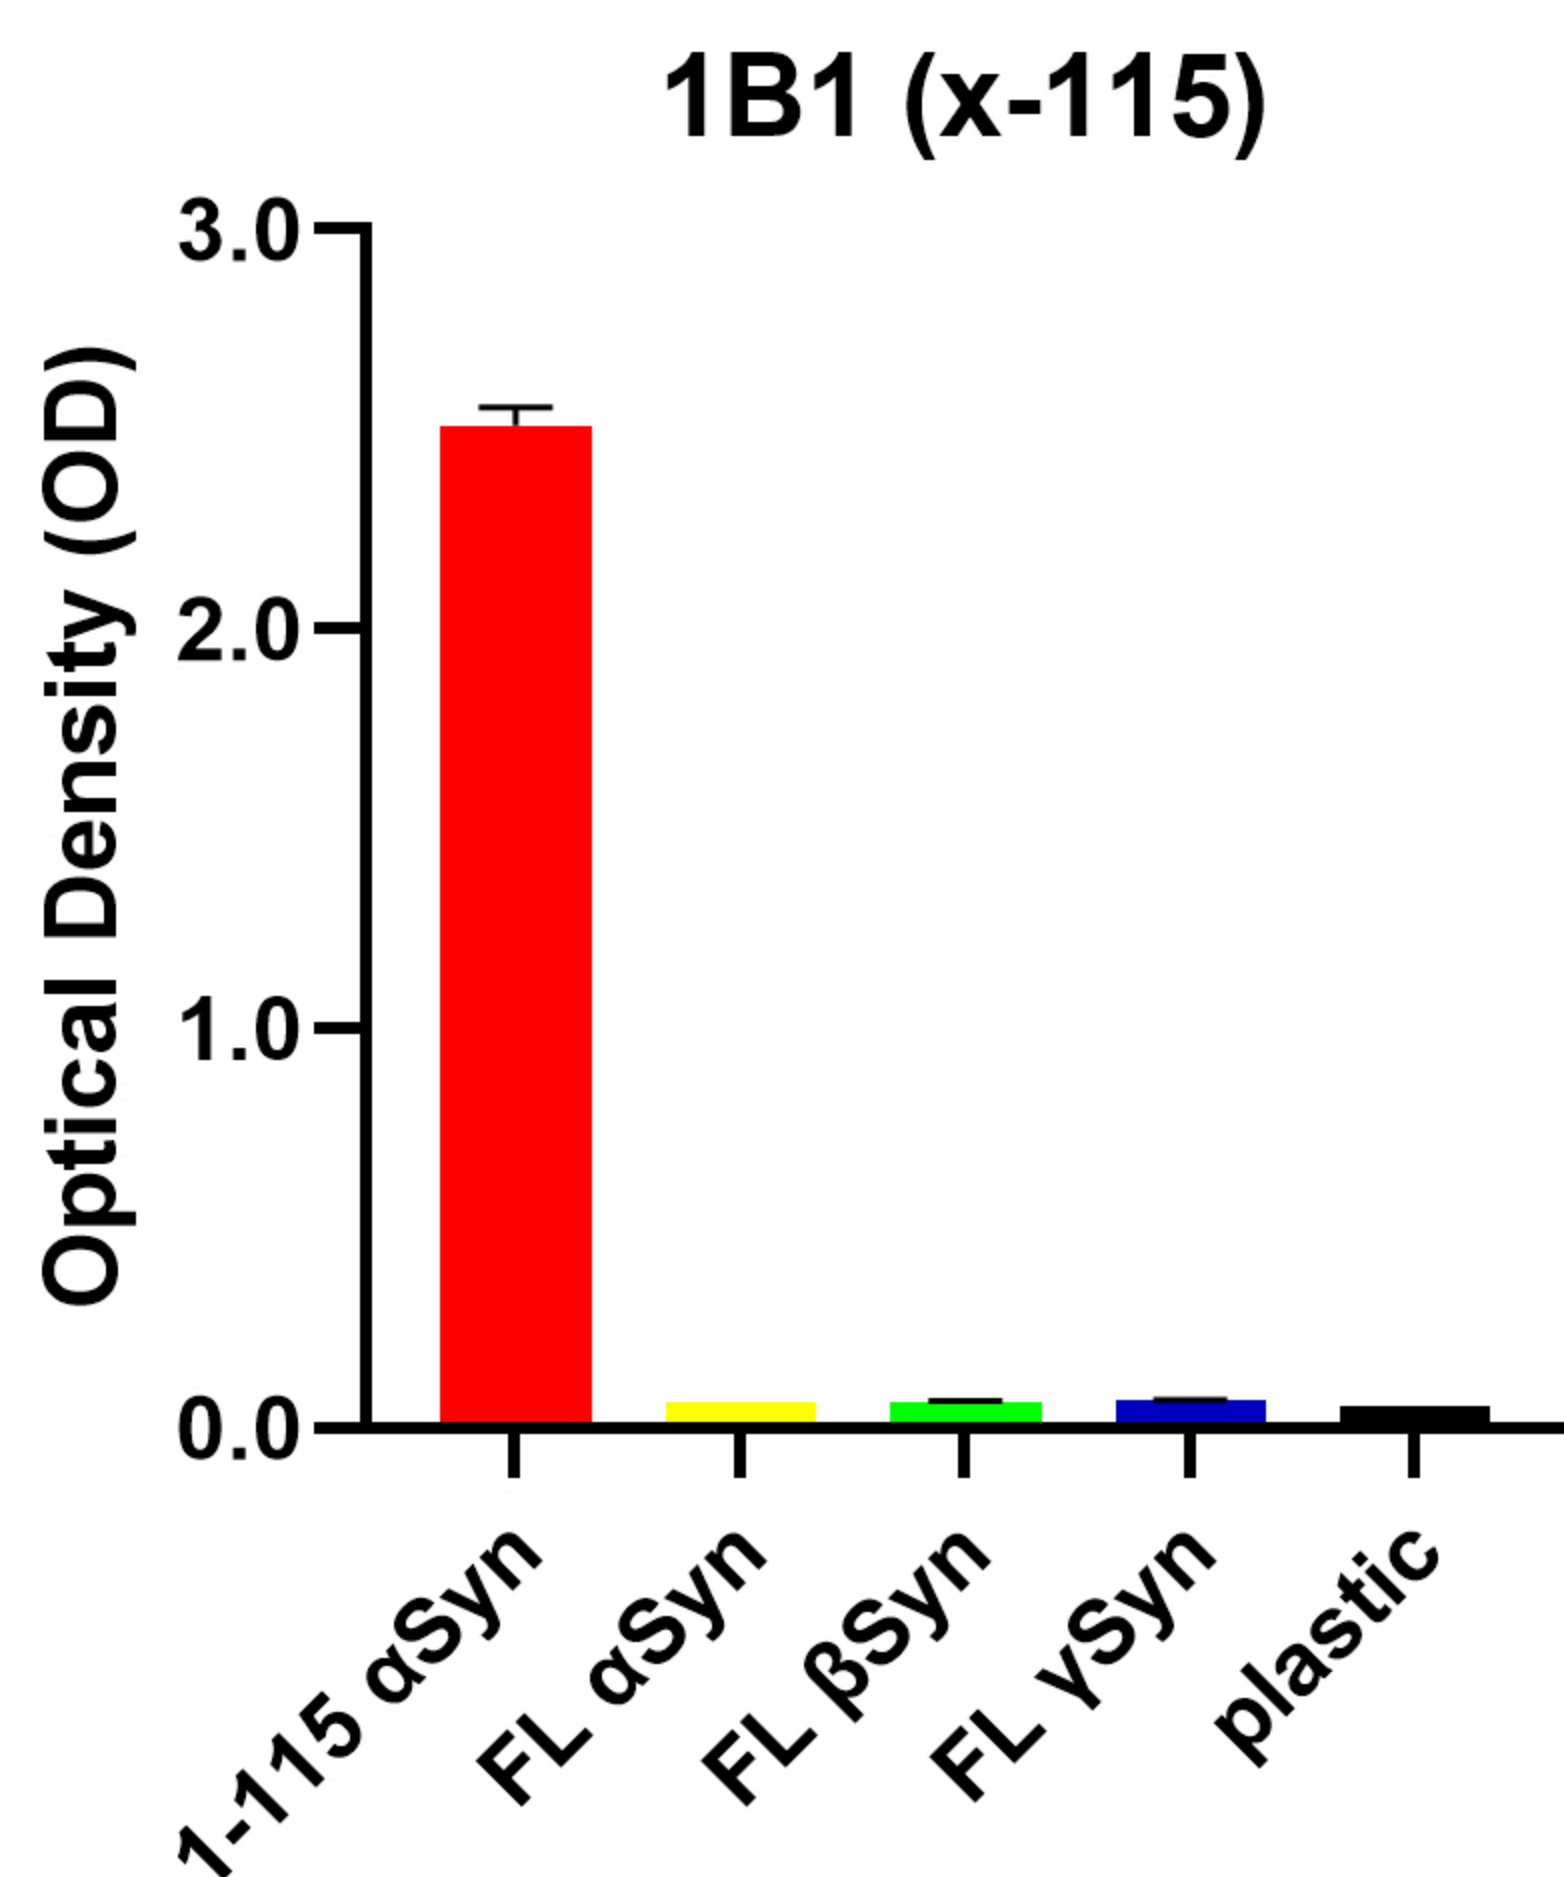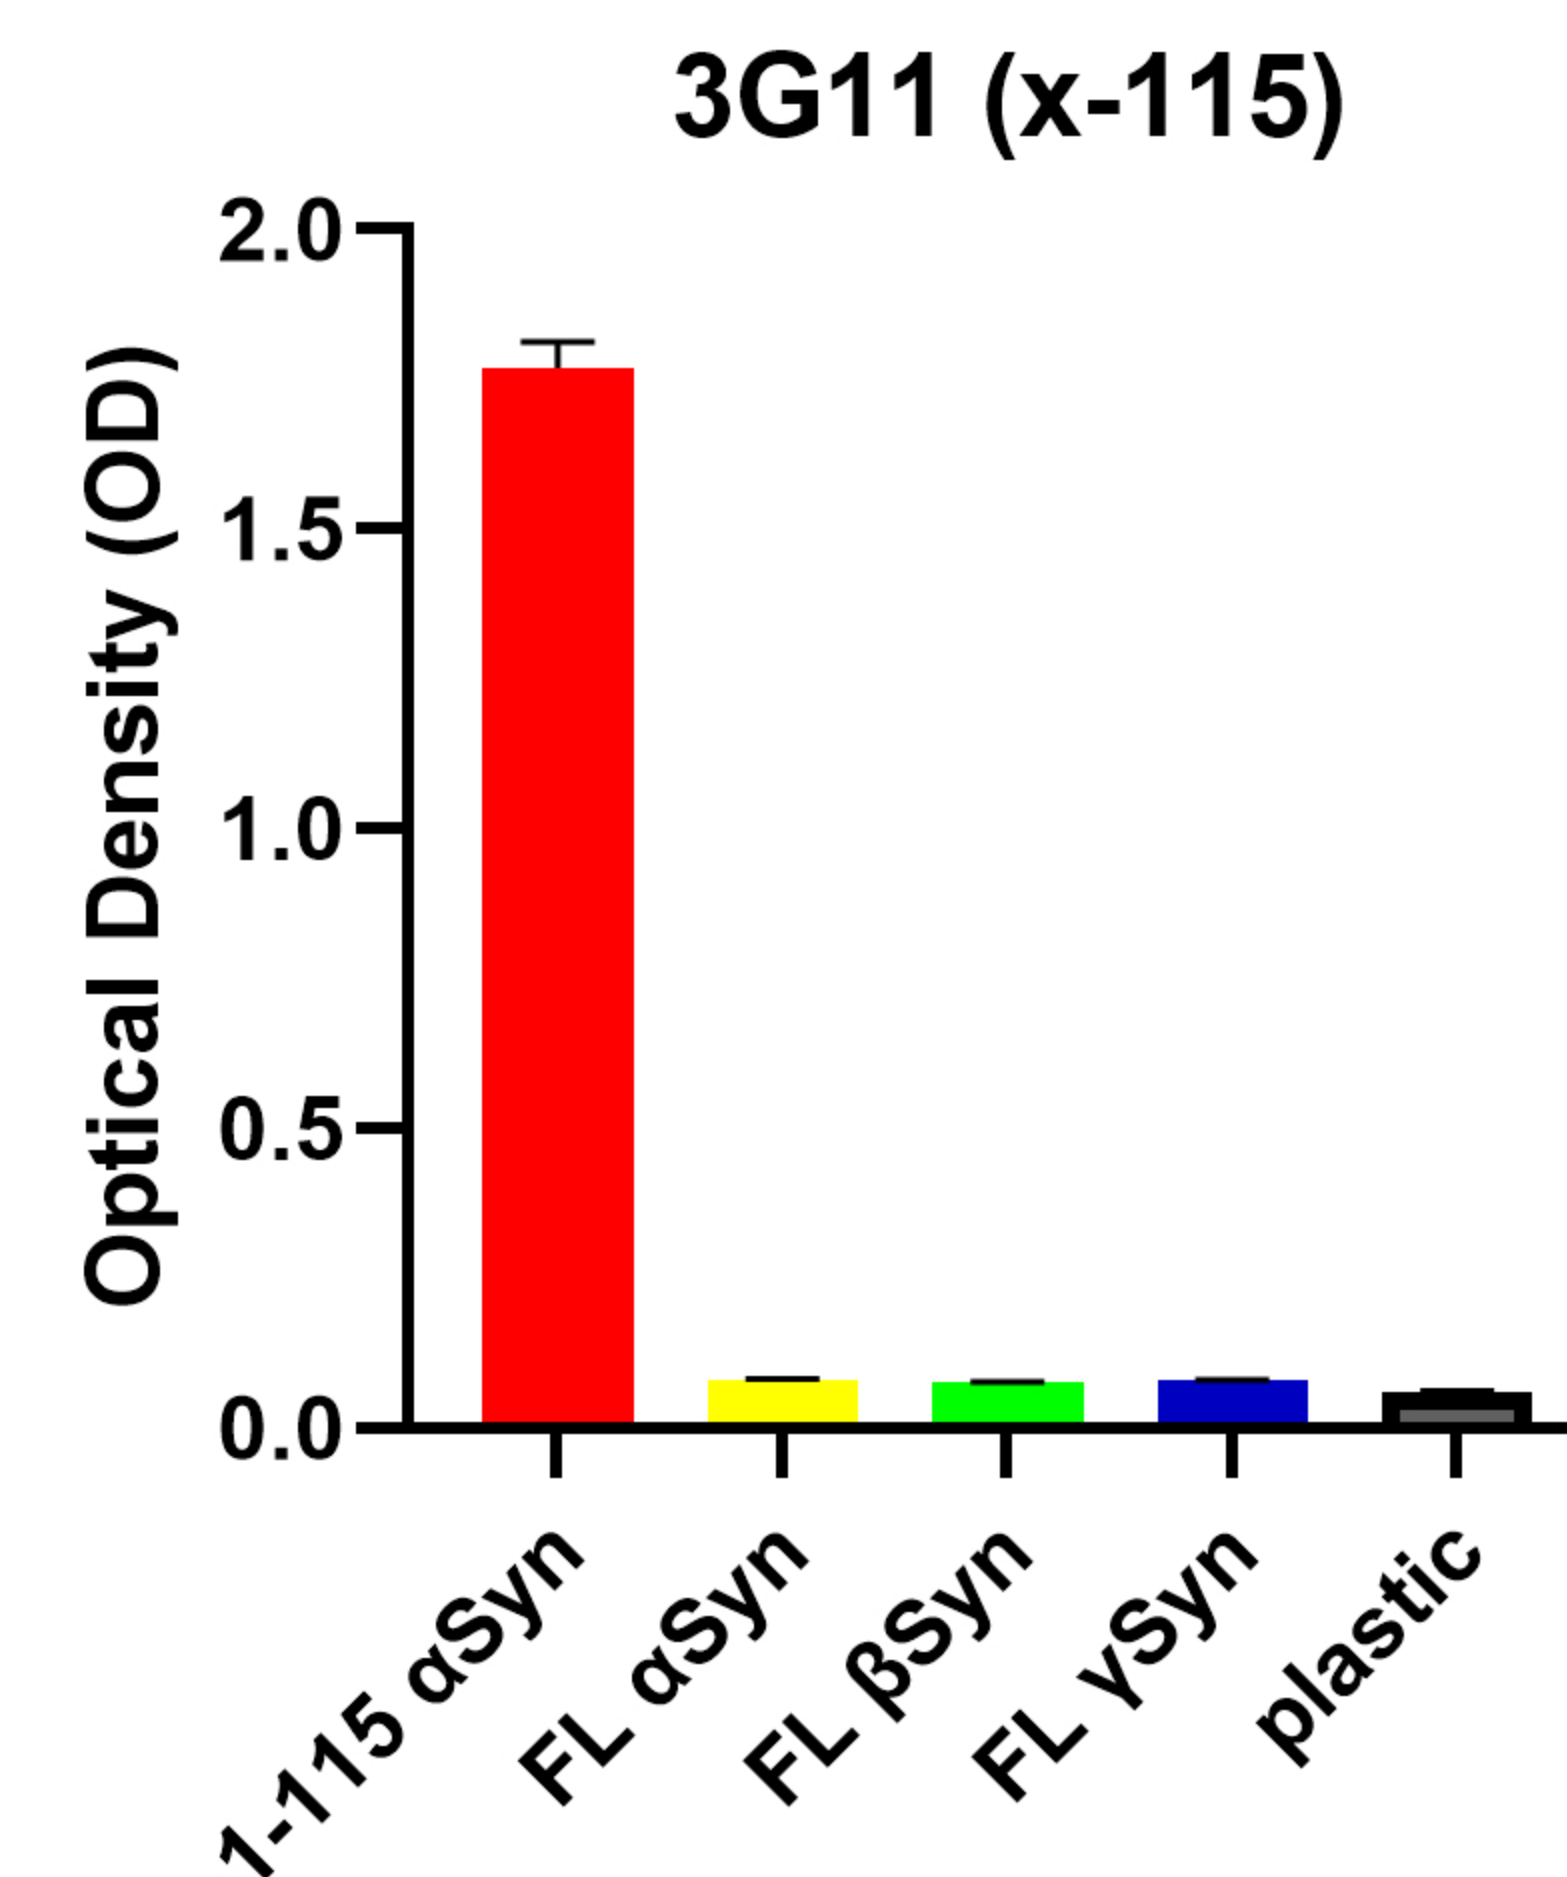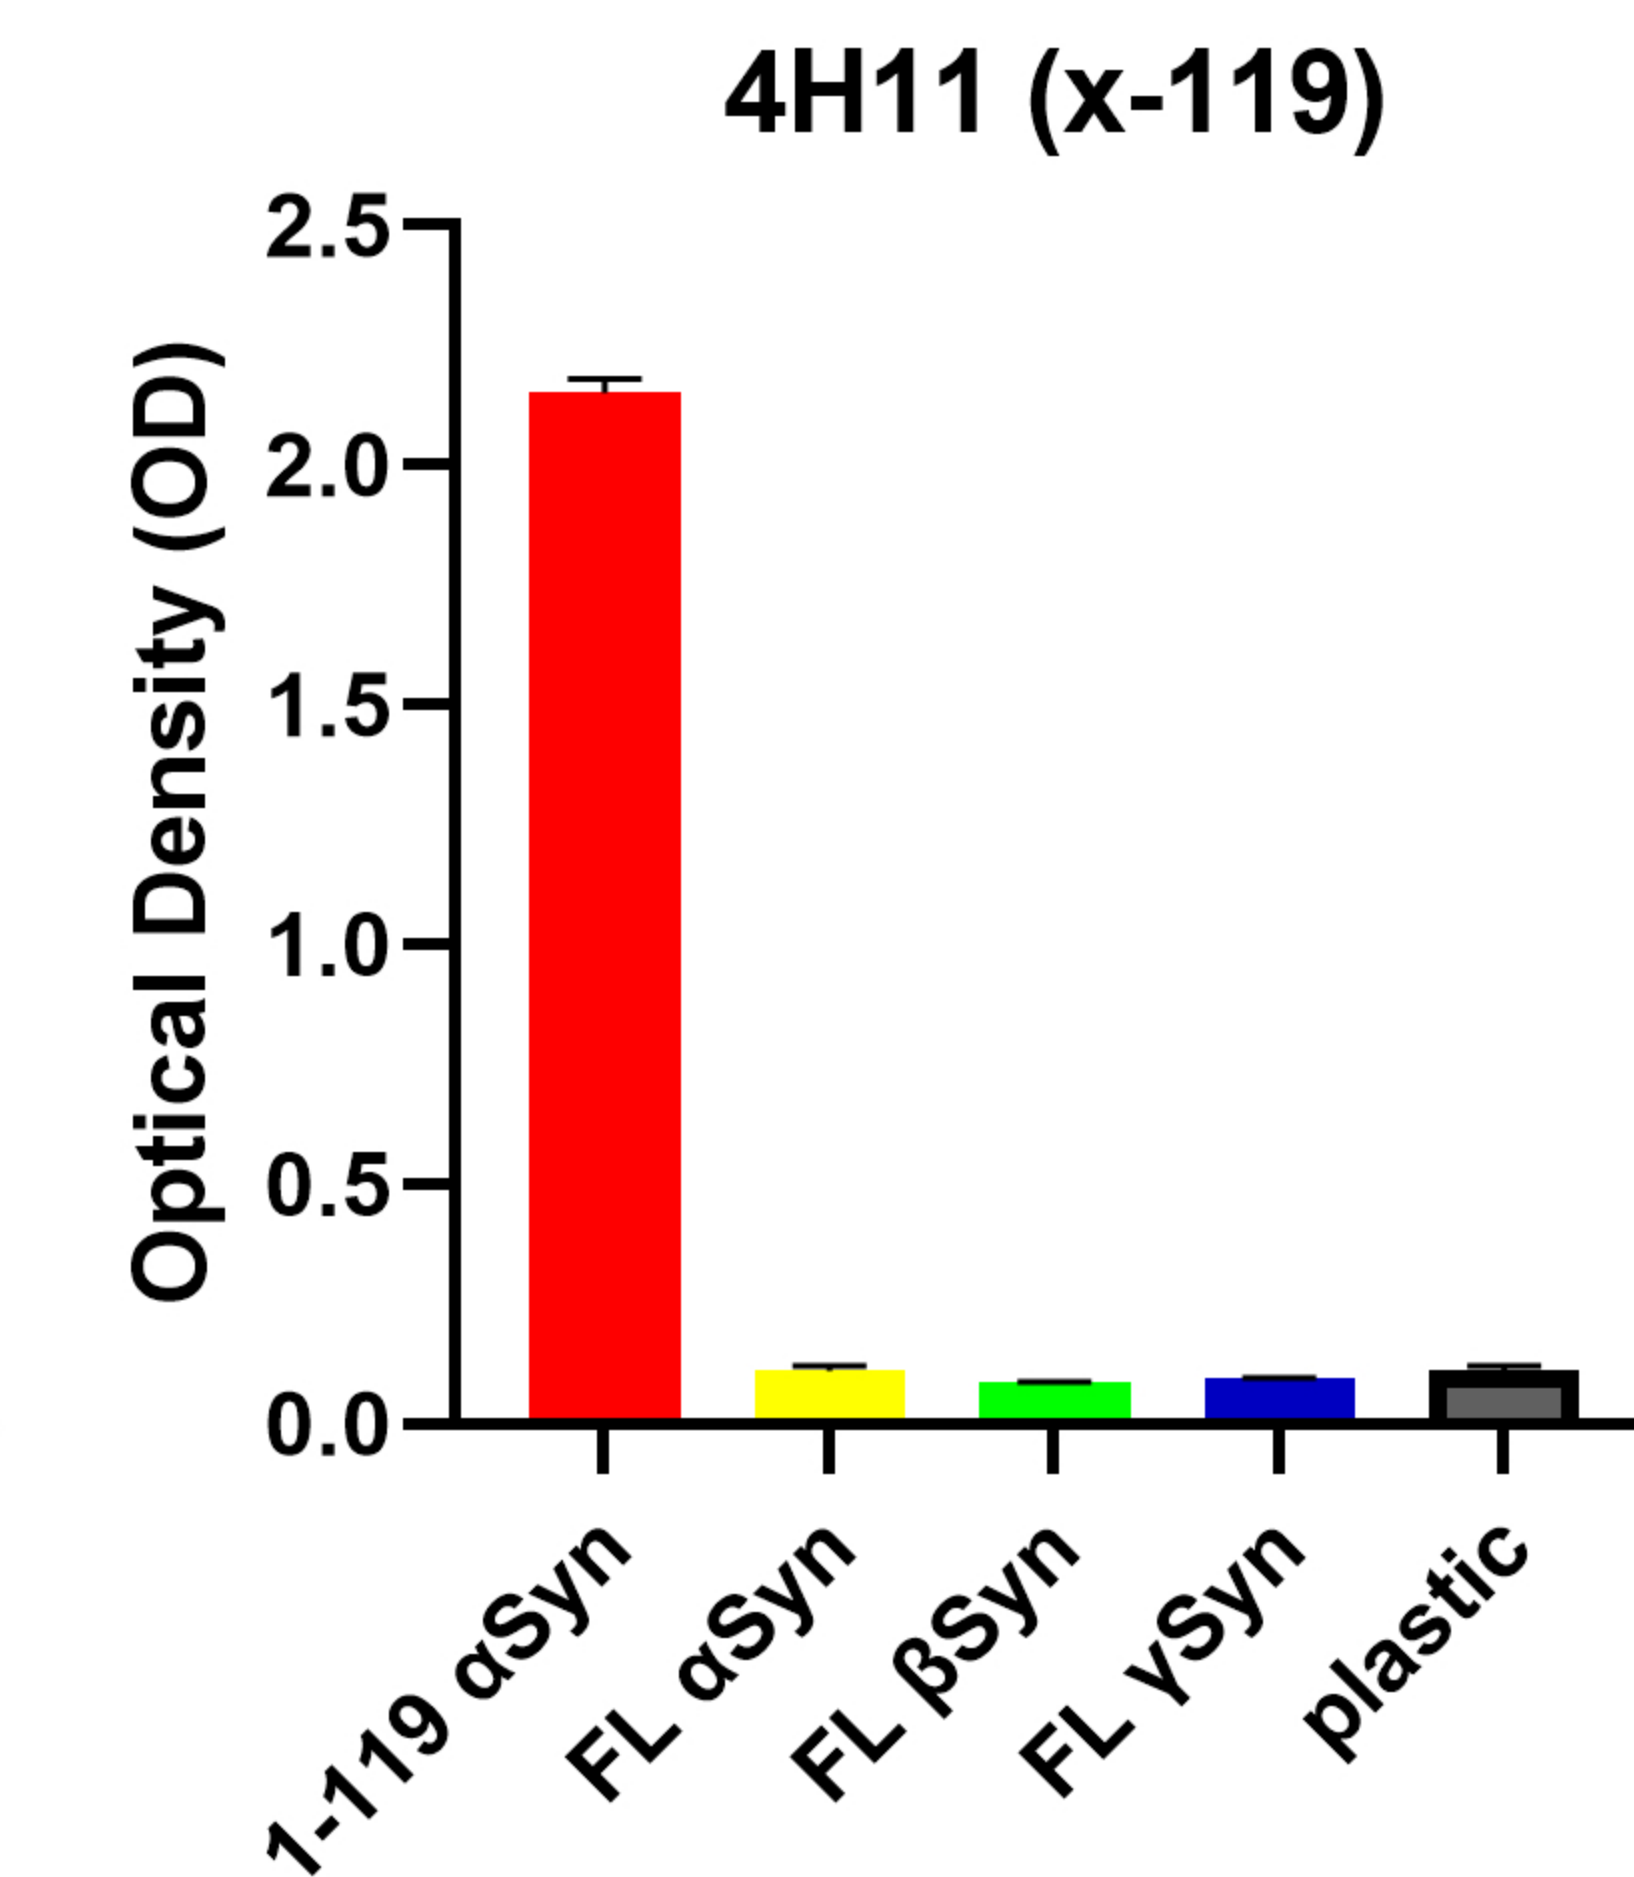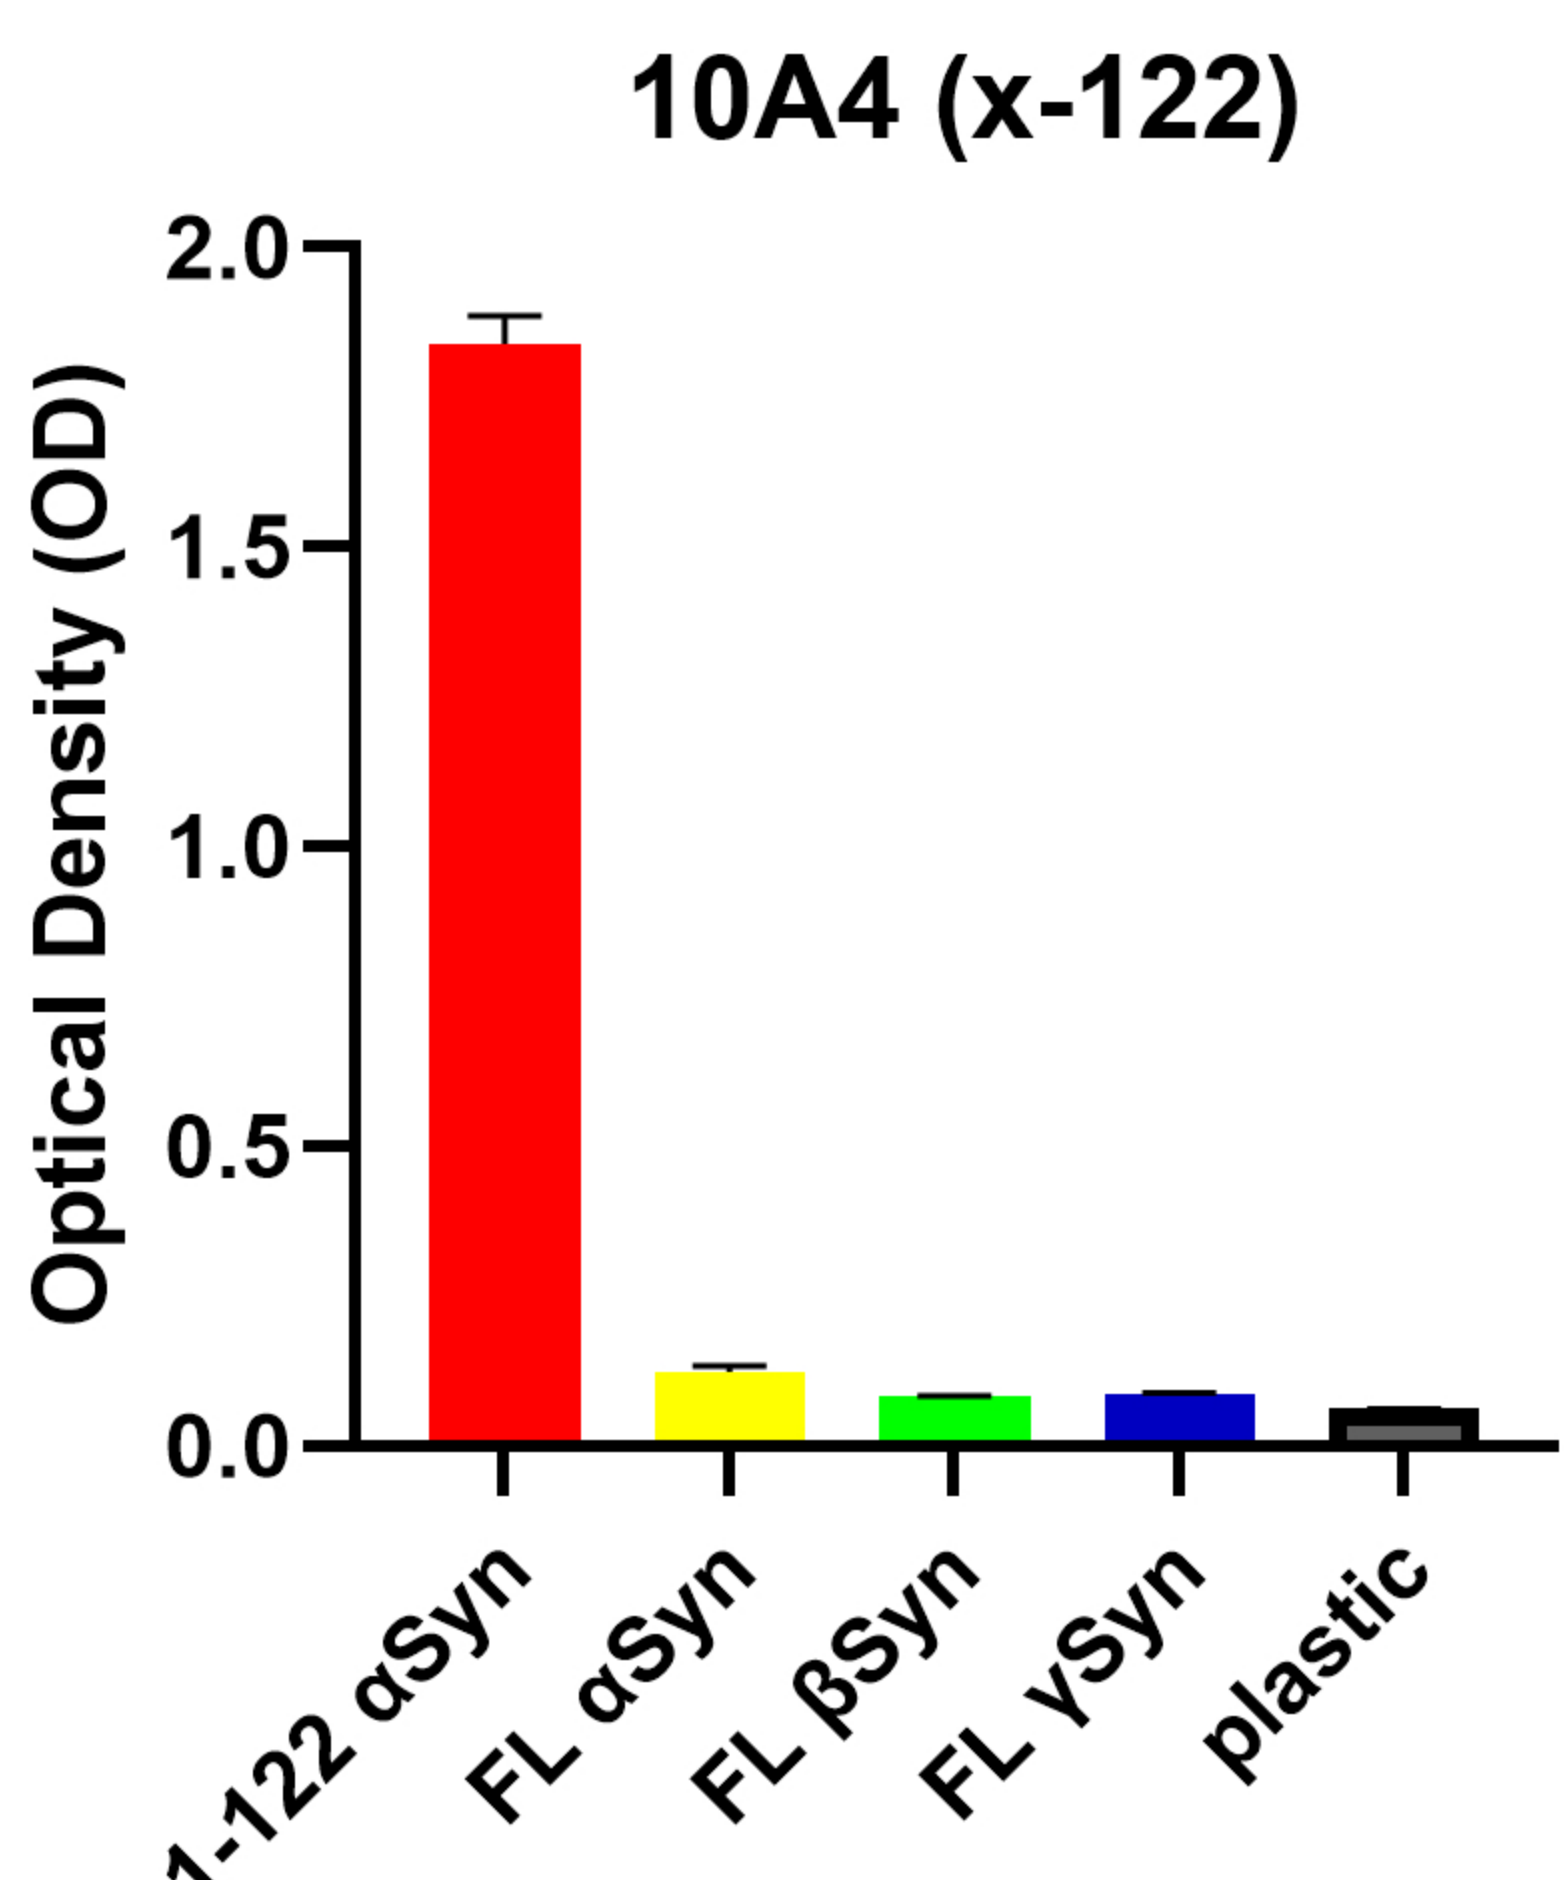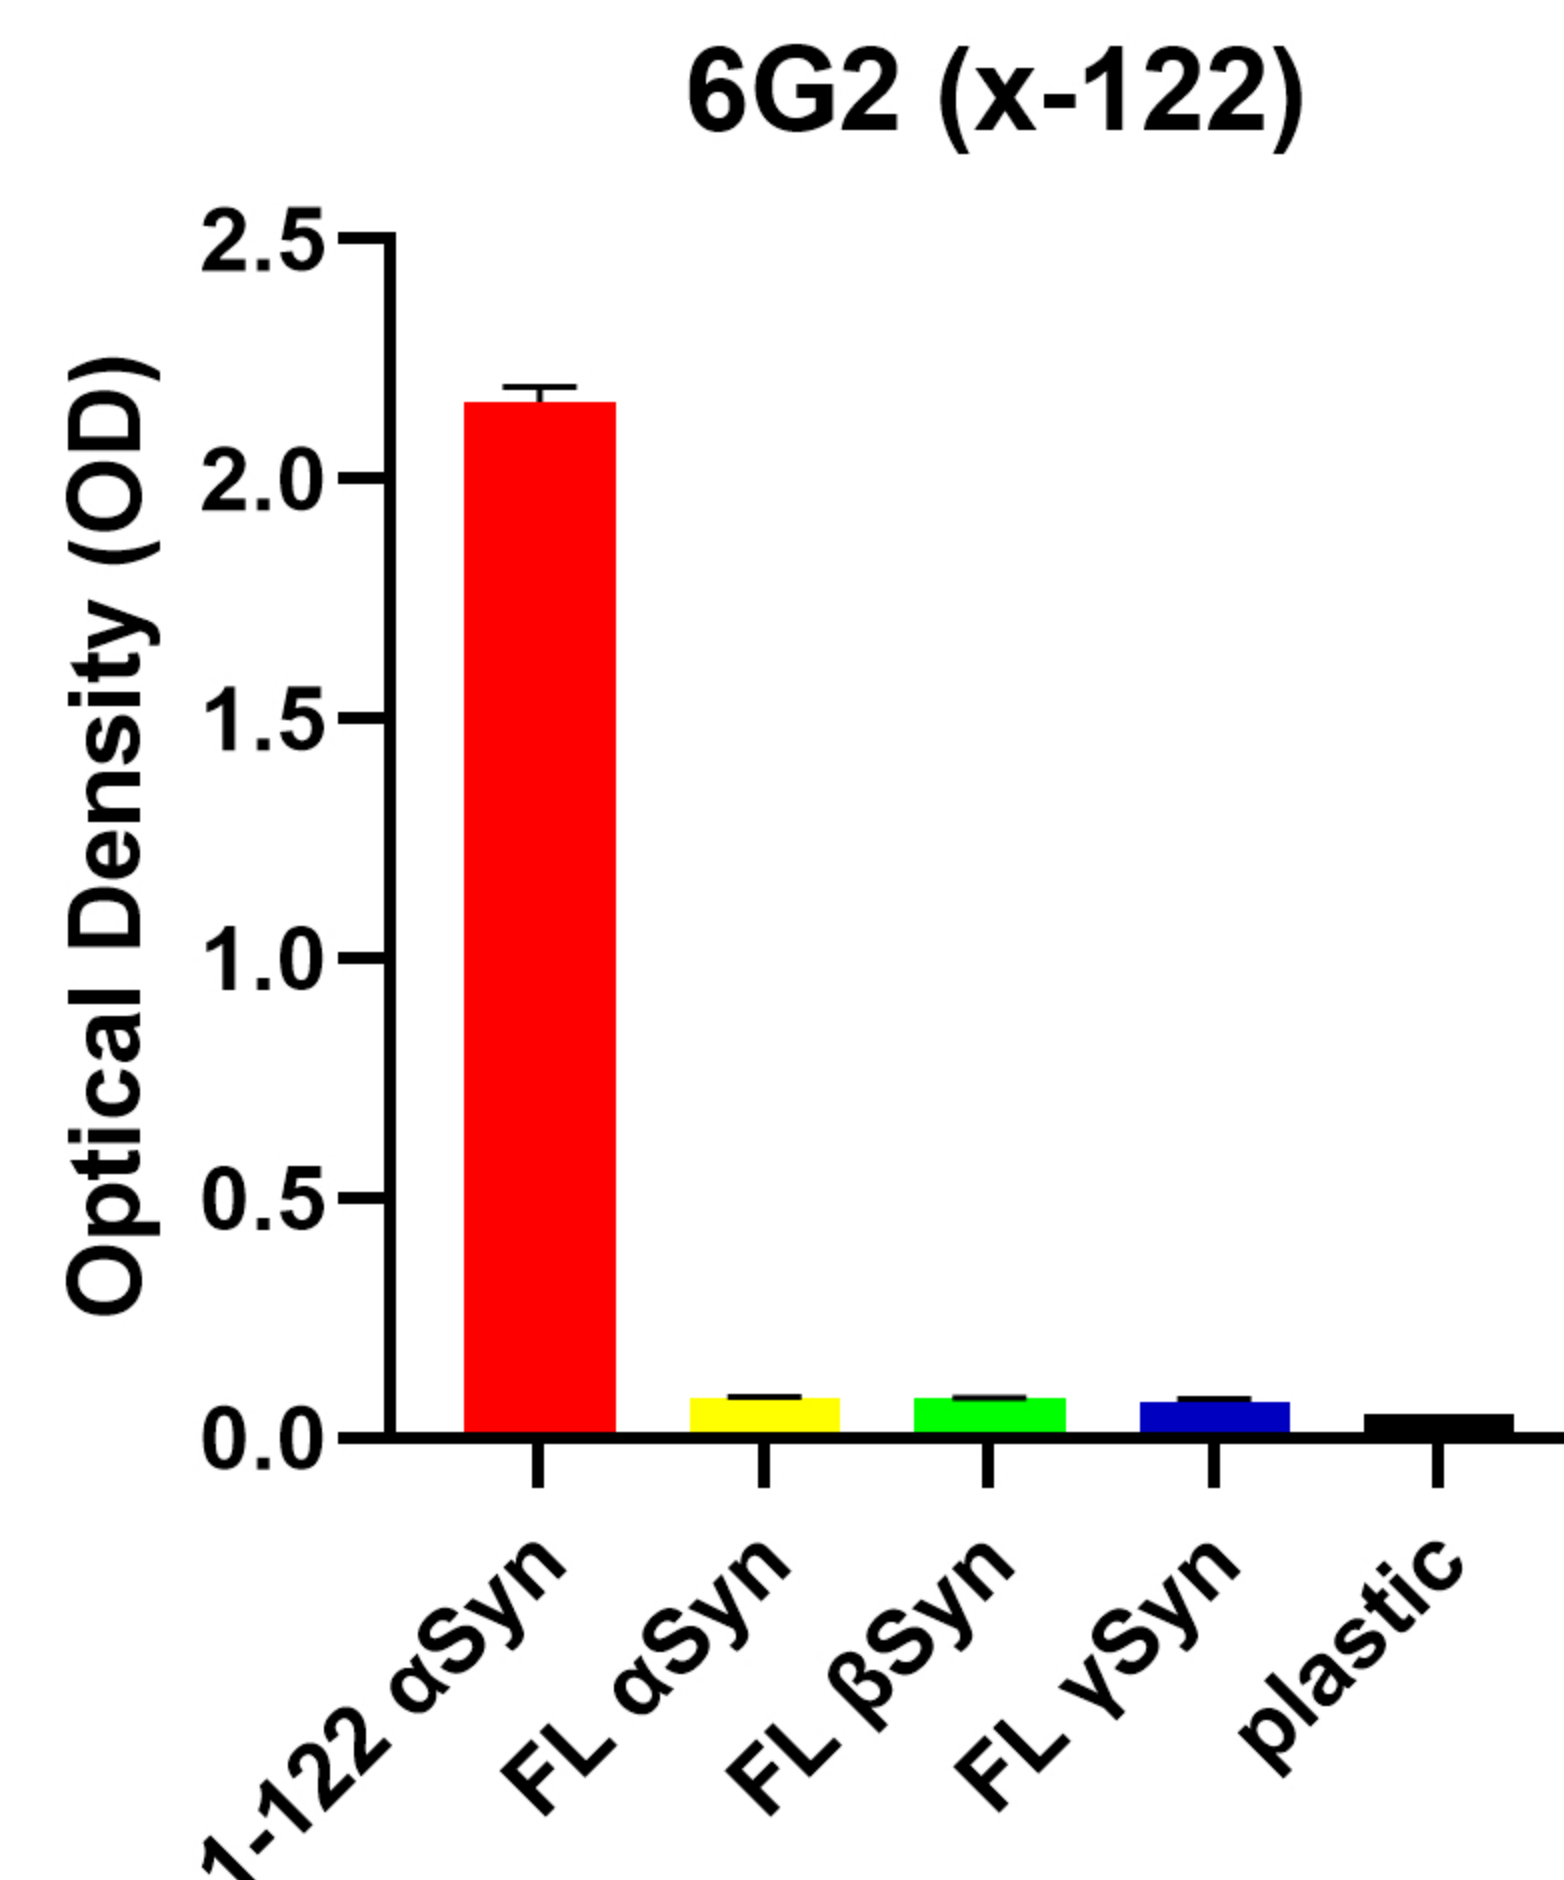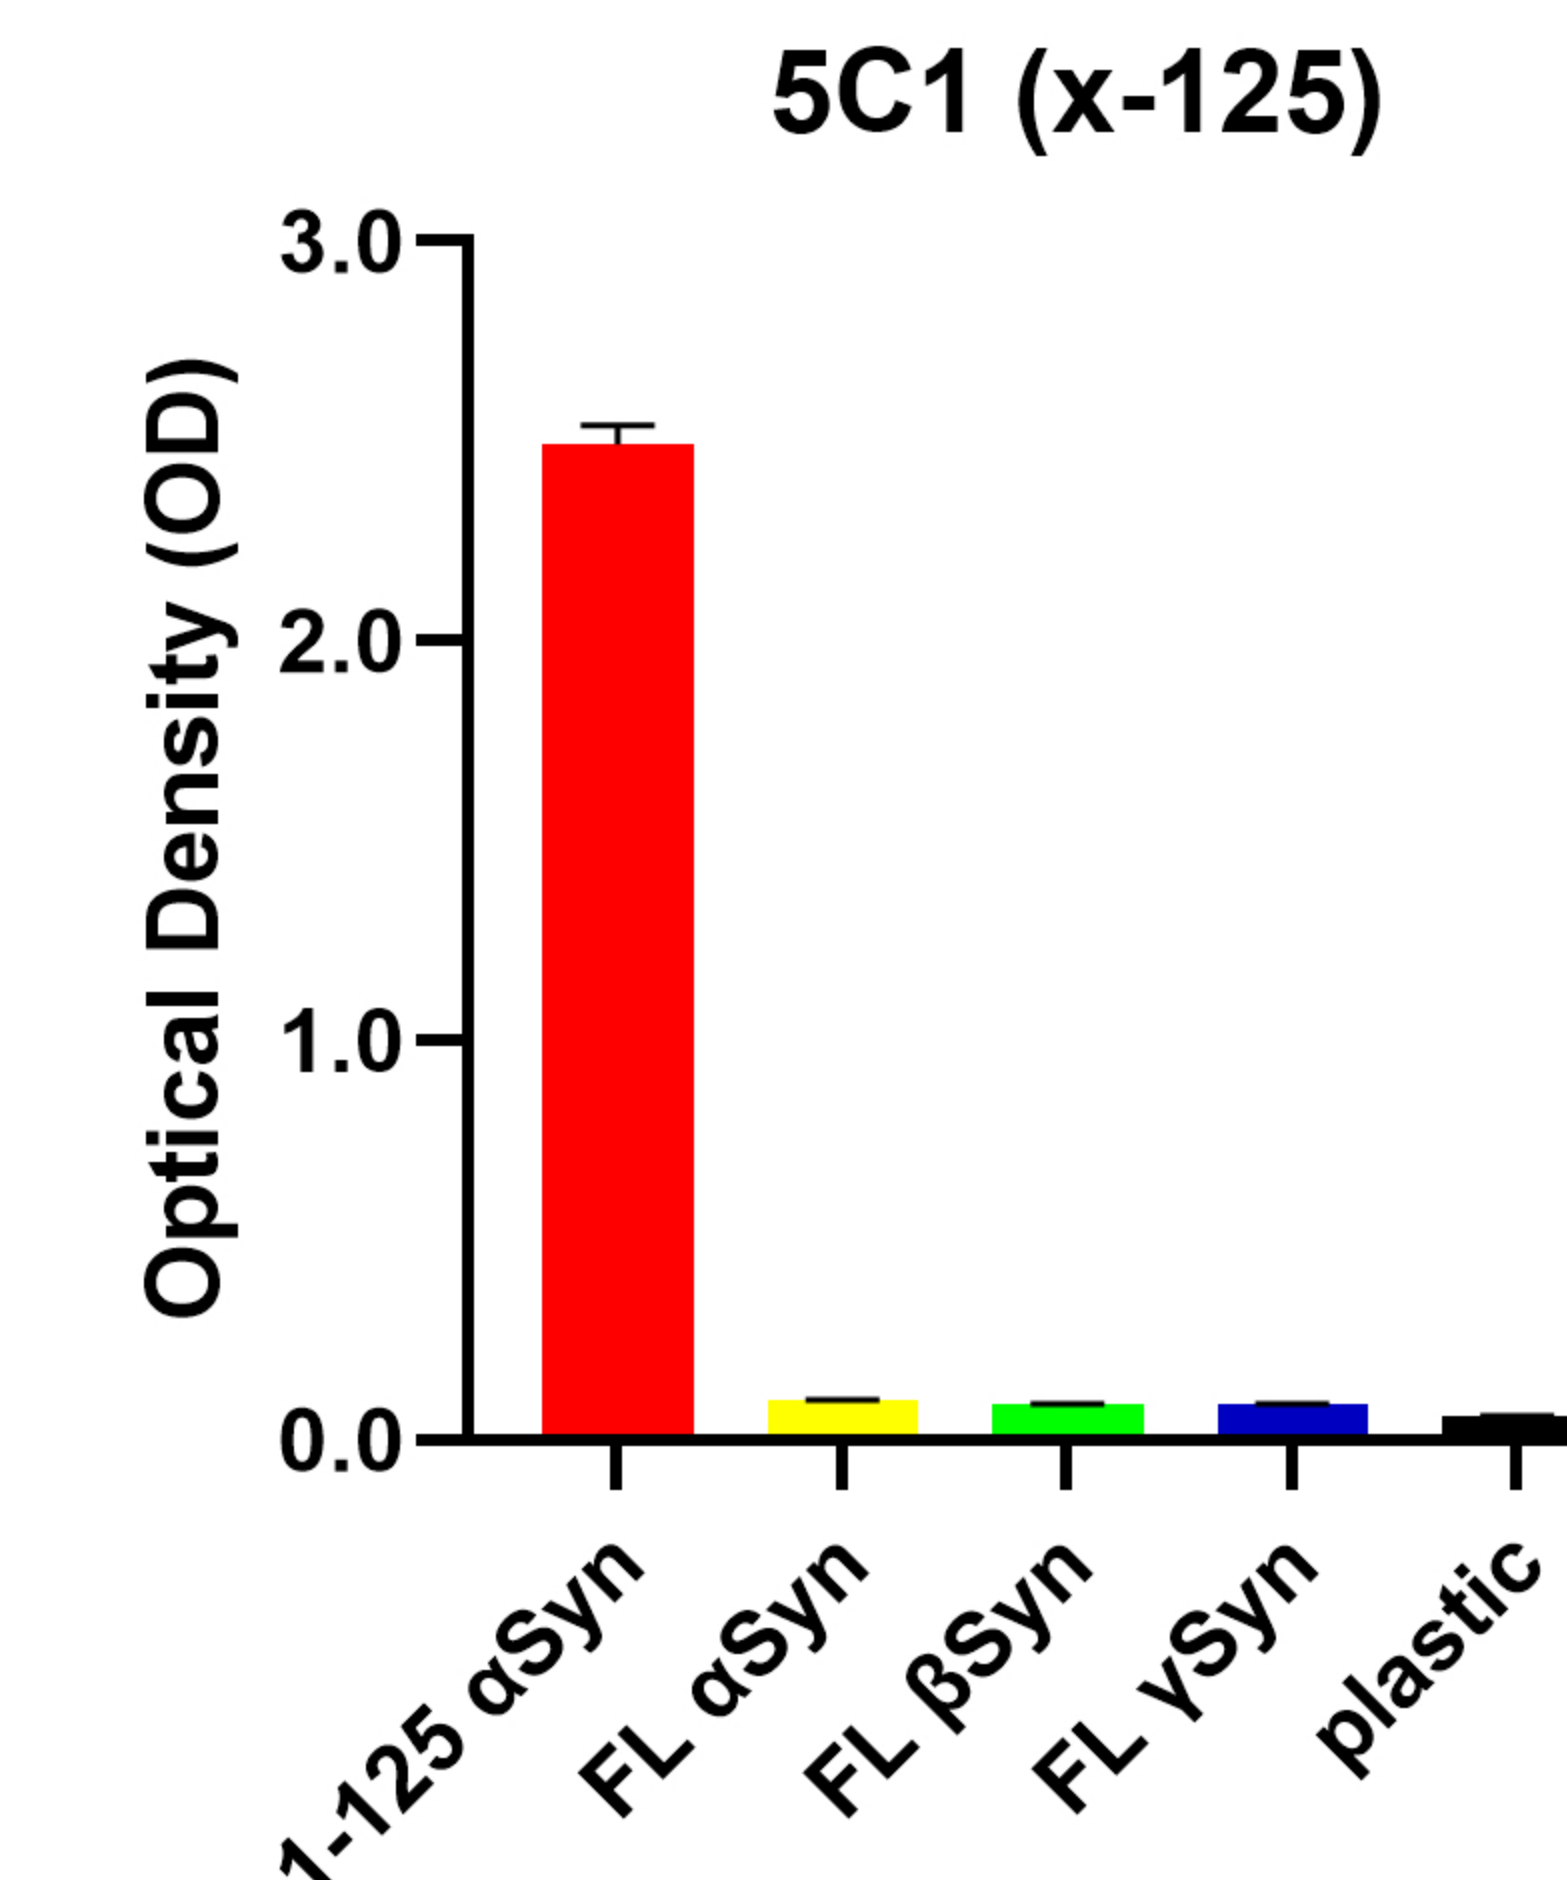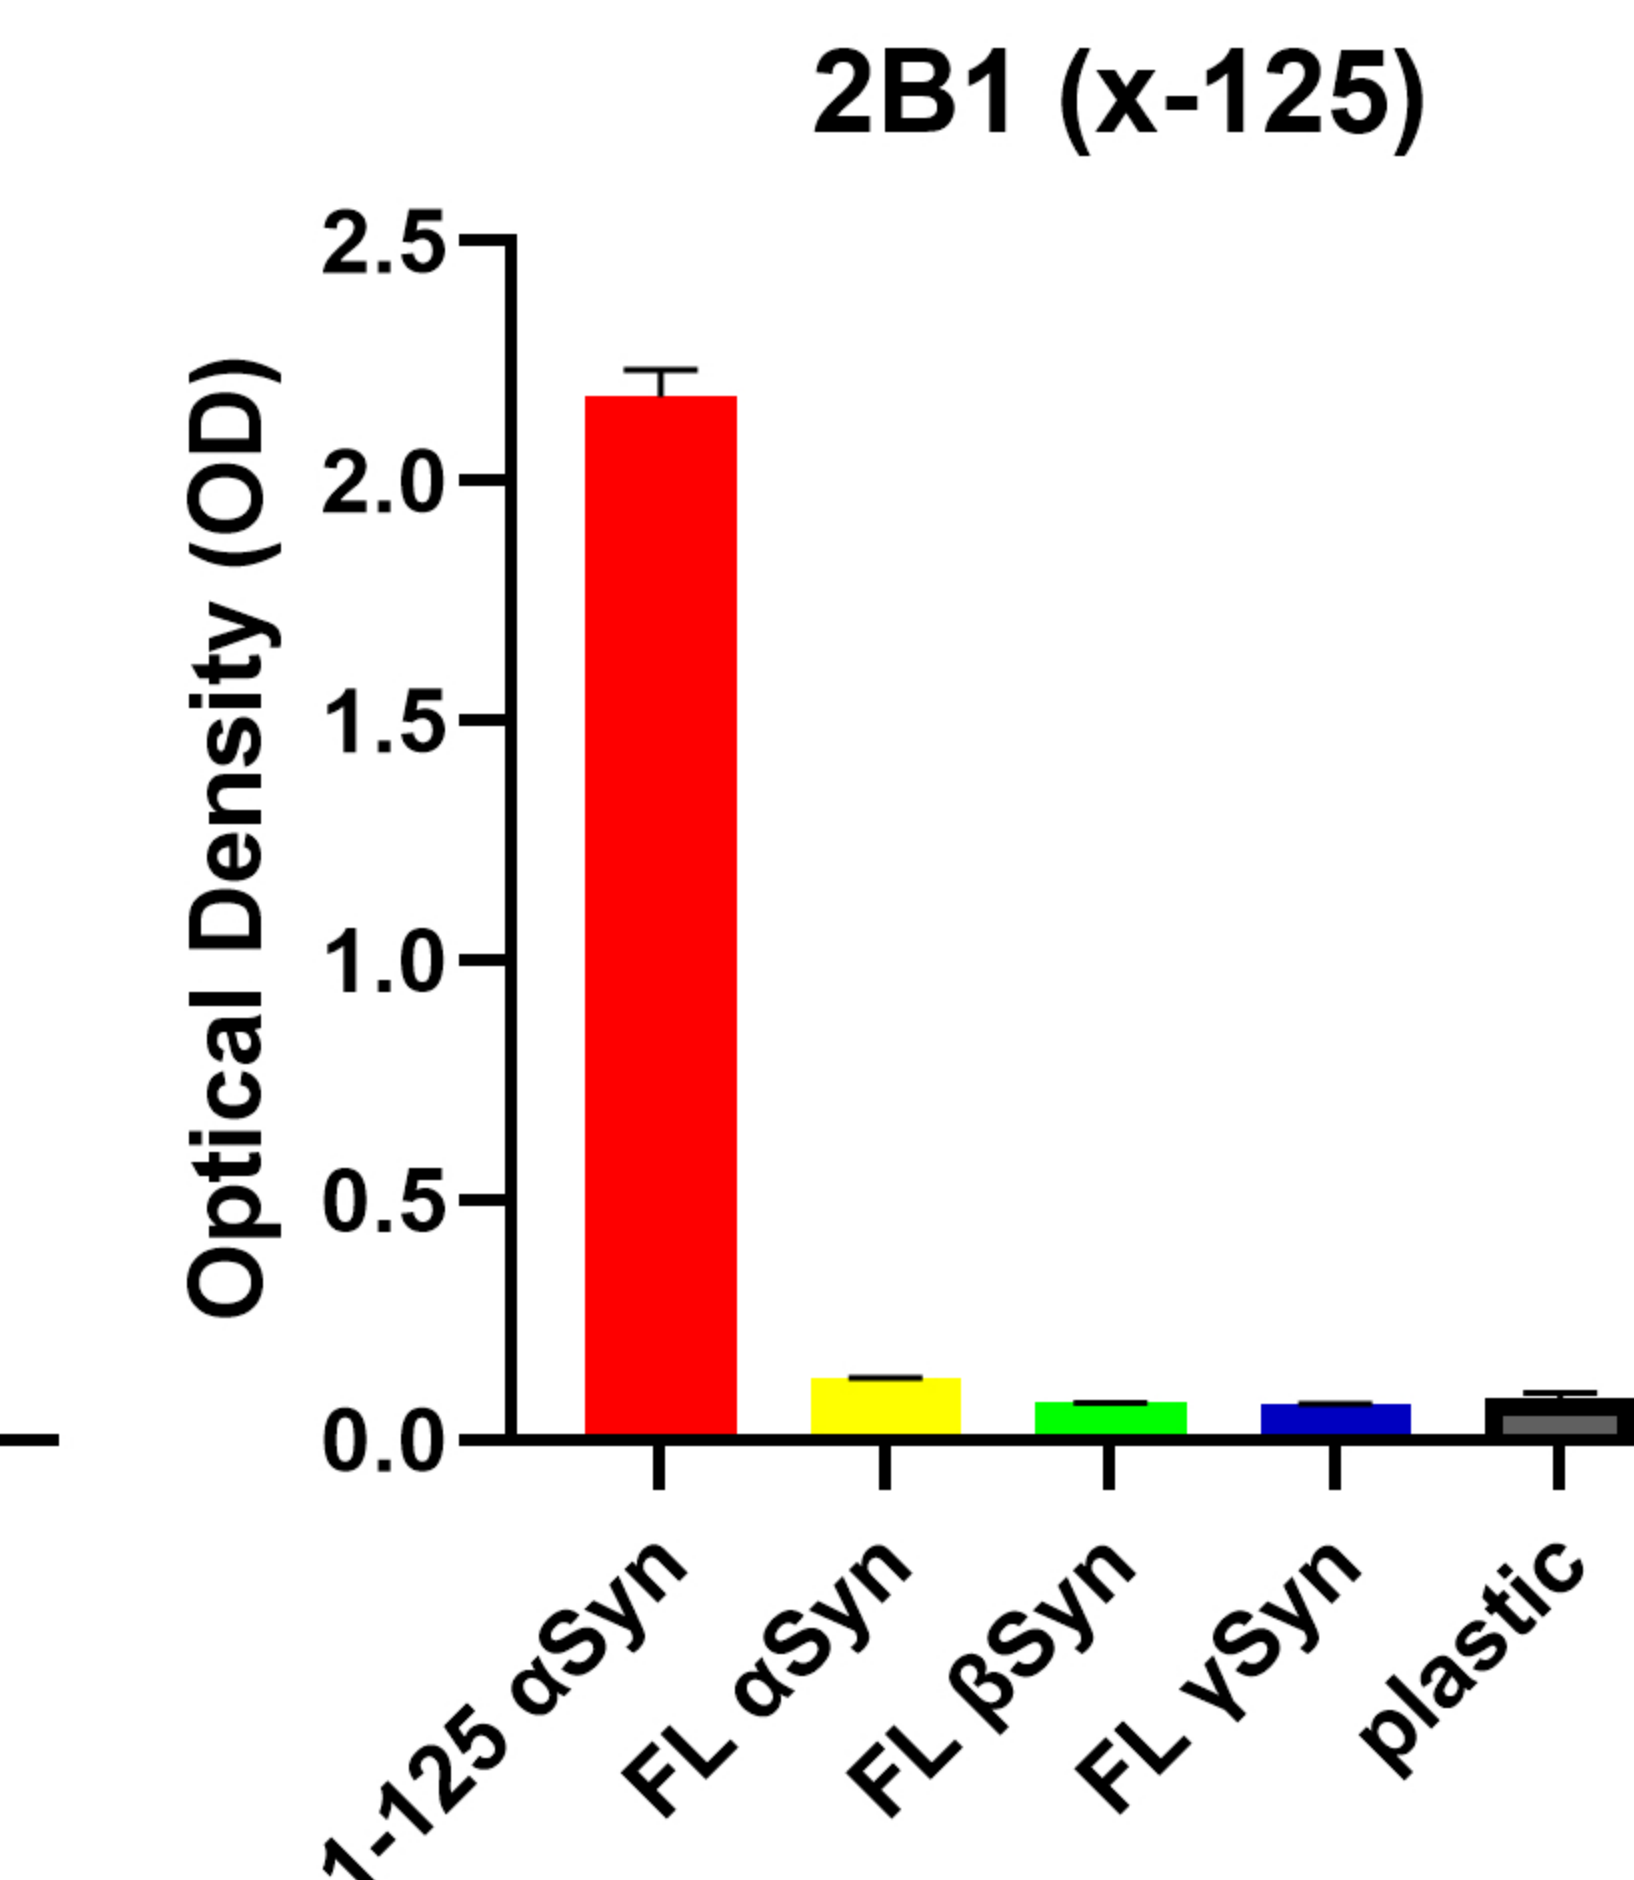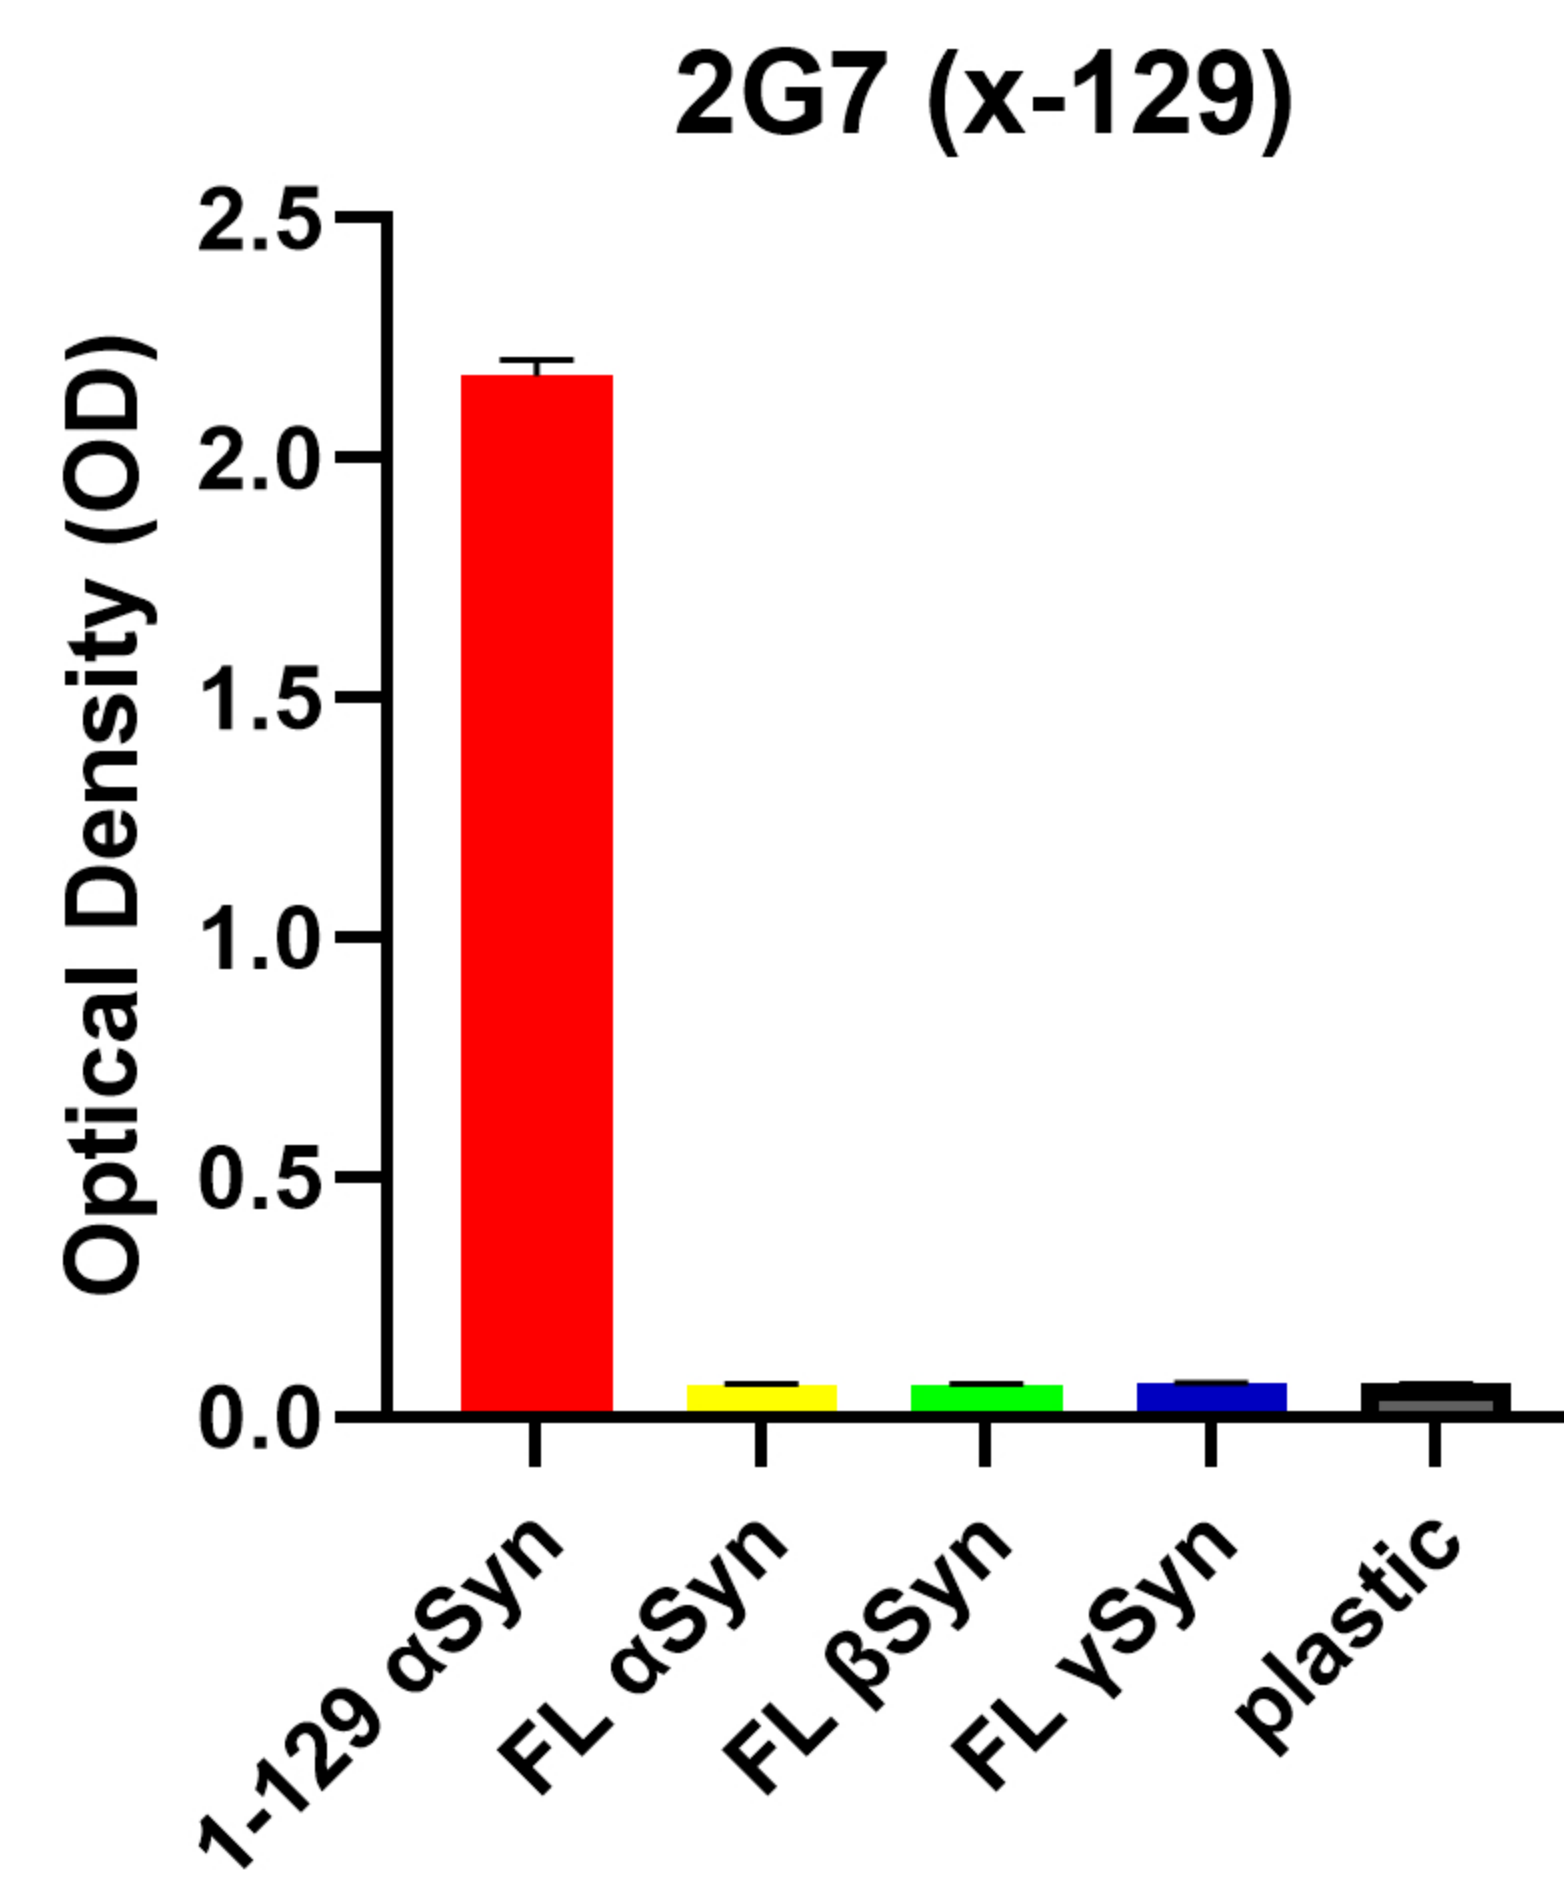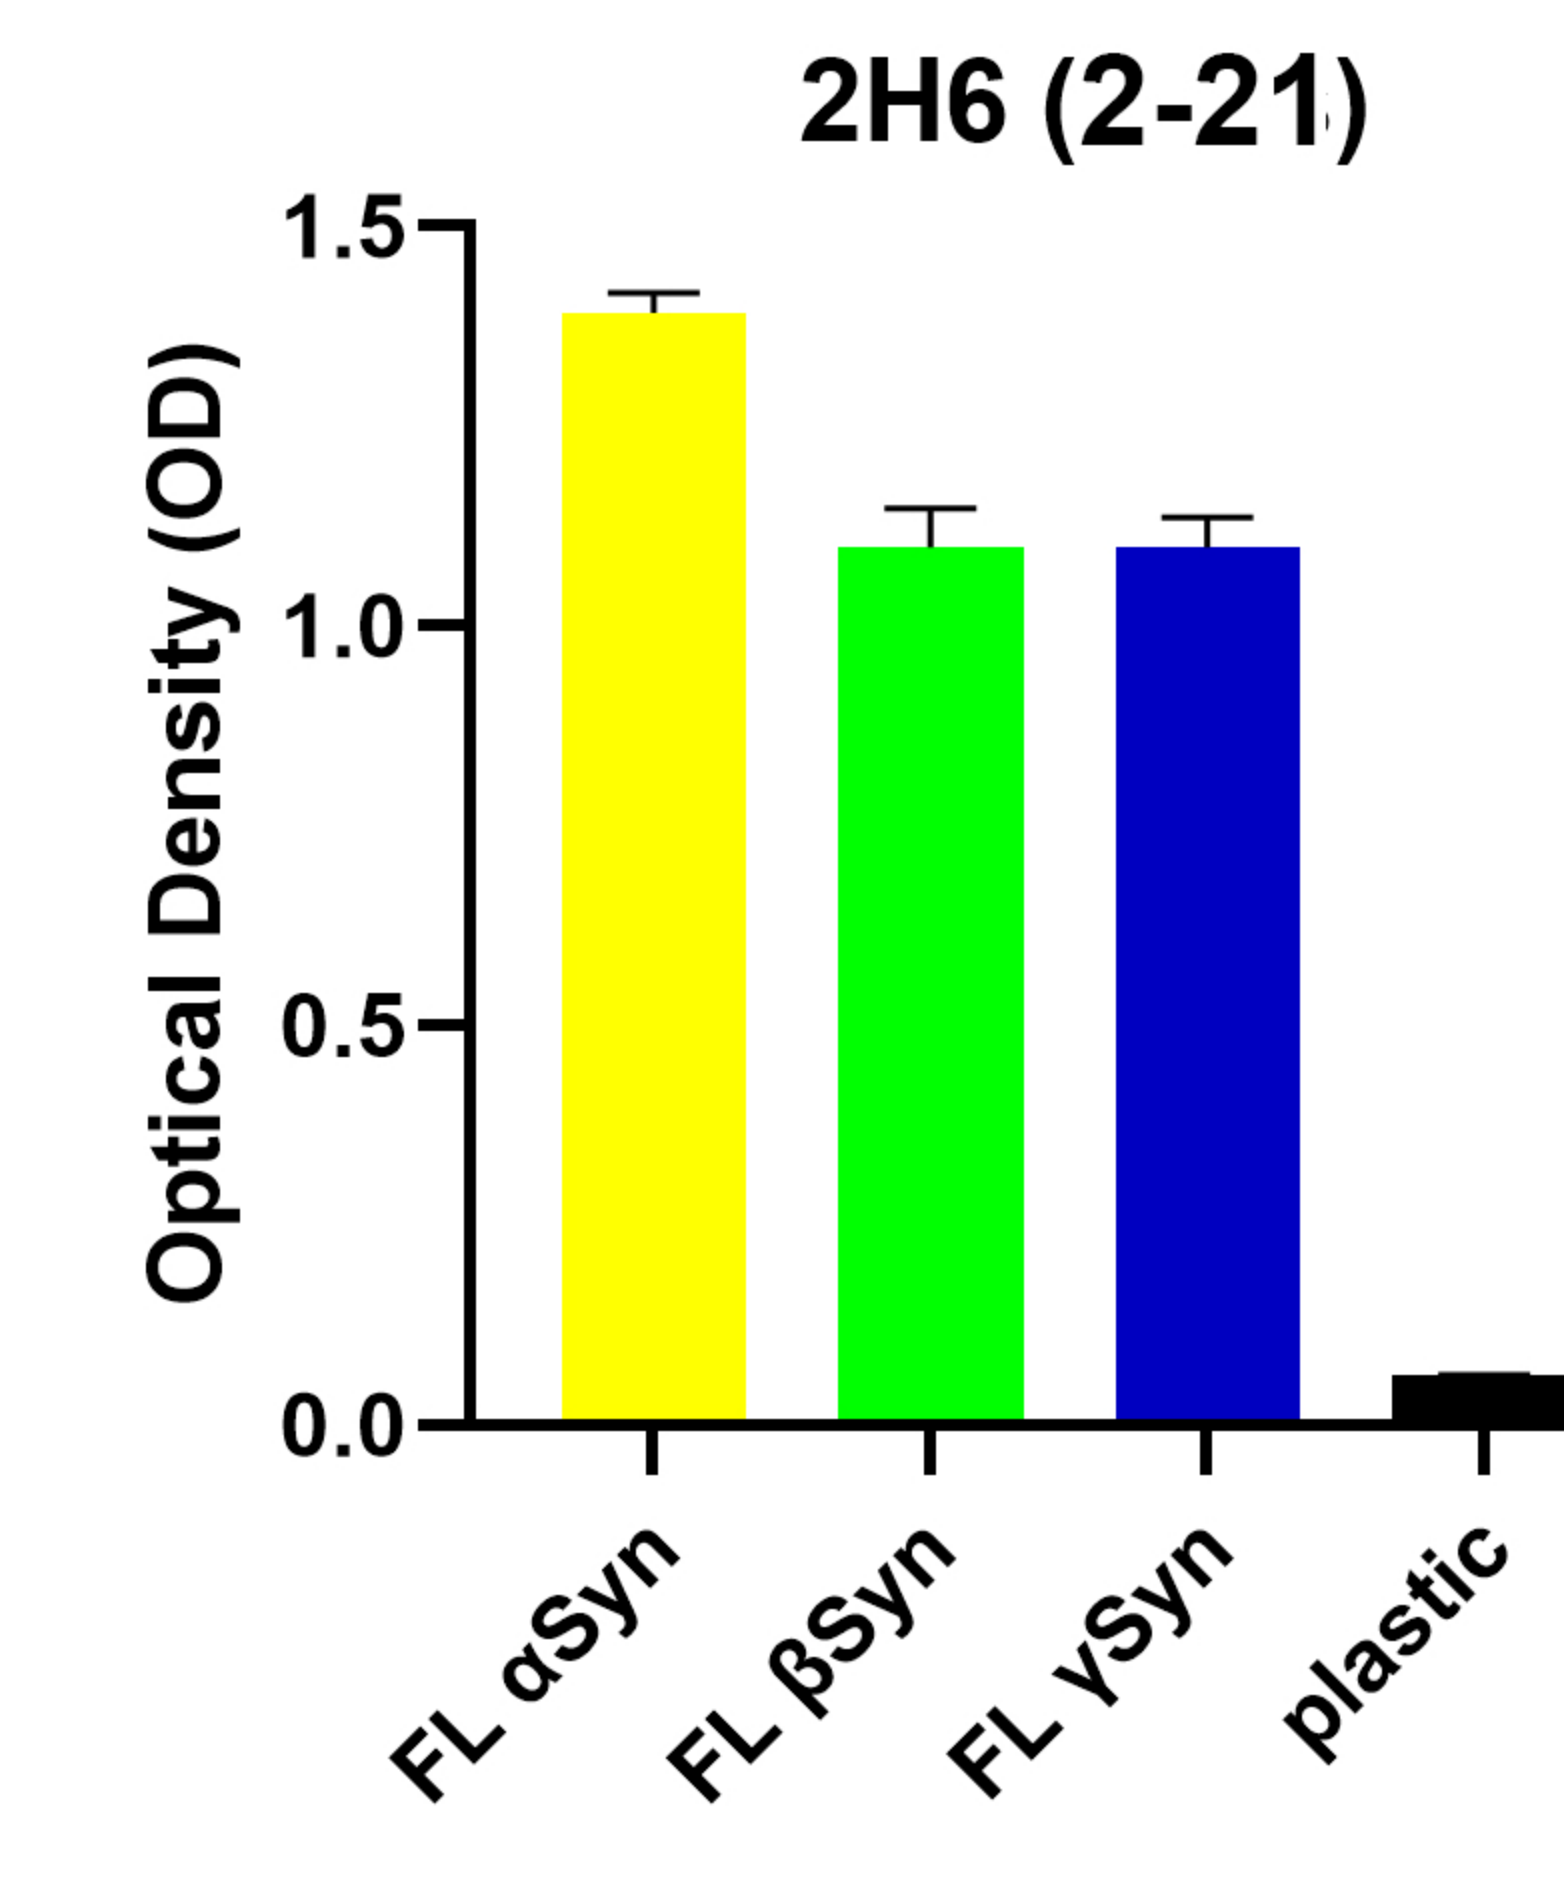

**Supplemental Figure 1**

**3H11 (43-62)**

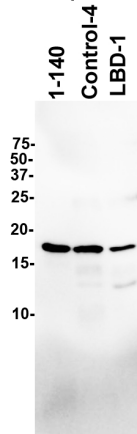

**2G7 (x-129)**

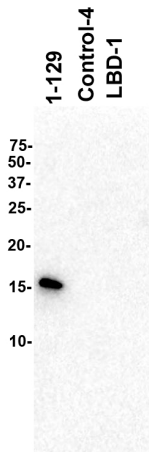

**2B1 (x-125)**

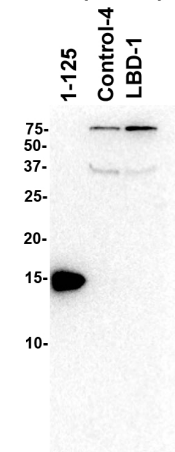

**5C1 (x-125)**

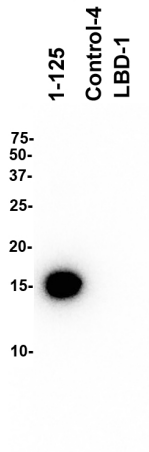

**10A4 (x-122)**

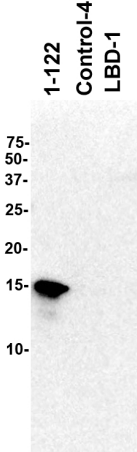

**6G2 (x-122)**

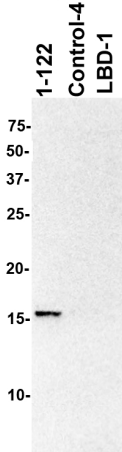

**4H11 (x-119)**

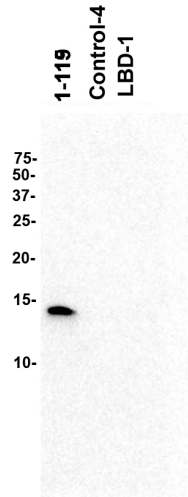

**1B1 (x-115)**

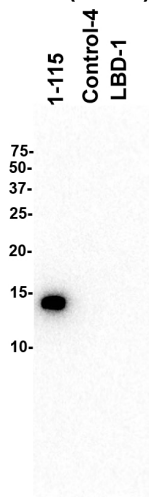

**3G11 (x-115)**

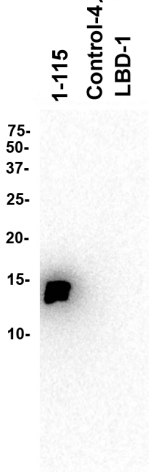

**2G5 (x-103)**

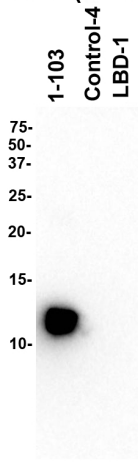

**Supplemental Figure 2**

| <b>Antibody name and preparation type</b> | <b>Dilution for ELISA</b> | <b>Dilution for Western blotting</b> | <b>Dilution for IHC</b> |
|-------------------------------------------|---------------------------|--------------------------------------|-------------------------|
| 2G5 (TC supernatant)                      | 1:2                       | 1:2                                  | none                    |
| 1B1 (TC supernatant)                      | 1:2                       | 1:2                                  | 1:10                    |
| 3G11 (TC supernatant)                     | 1:2                       | 1:2                                  | none                    |
| 4H11 (TC supernatant)                     | 1:2                       | 1:2                                  | none                    |
| 6G2 (TC supernatant)                      | 1:2                       | 1:2                                  | none                    |
| 10A4 (TC supernatant)                     | 1:2                       | 1:2                                  | none                    |
| 5C1 (TC supernatant)                      | 1:2                       | 1:2                                  | none                    |
| 2B1 (TC supernatant)                      | 1:2                       | 1:2                                  | none                    |
| 2G9 (TC supernatant)                      | 1:2                       | 1:2                                  | none                    |
| 3H11 (ascites fluid)                      | 1:5000                    | 1:1000                               | NA                      |
| 94-3A10 (ascites fluid)                   | NA                        | NA                                   | 1:10,000                |
| 2H6 (ascites fluid)                       | 1:2000                    | NA                                   | NA                      |

**Supplemental Table 1. Dilution of Antibody Used.** TC, tissue culture media.
